# Supplementary material for: Copper-Containing Nanoparticles and Organic Complexes: Metal Reduction Triggers Rapid Cell Death via Oxidative Burst
Source: MDPI journal article supplement (doi:10.3390/ijms222011065), 2021-10-14
Supplement: s1 [file s1]

# Copper-Containing Nanoparticles and Organic Complexes: Metal Reduction Triggers Rapid Cell Death via Oxidative Burst

Sergey A. Tsymbal <sup>1,\*</sup>, Anna A. Moiseeva <sup>2</sup>, Nikol A. Agadzhanian <sup>1</sup>, Svetlana S. Efimova <sup>3</sup>, Alina A. Markova <sup>4,5</sup>, Dmitry A. Guk <sup>2</sup>, Olga O. Krasnovskaya <sup>2</sup>, Victoria M. Alpatova <sup>5</sup>, Andrei V. Zaitsev <sup>5</sup>, Anna V. Shibaeva <sup>4</sup>, Victor V. Tatarskiy <sup>6</sup>, Marina S. Dukhinova <sup>1</sup>, Valentina A. Ol'shevskaya <sup>5</sup>, Olga S. Ostroumova <sup>3</sup>, Elena K. Beloglazkina <sup>2,†</sup> and Alexander A. Shtil <sup>2,7,†</sup>

<sup>1</sup> International Institute of Solution Chemistry of Advanced Materials and Technologies, ITMO University, 197101 Saint-Petersburg, Russia; agadzhanian@scamt-itmo.ru (N.A.A.); dukhinova@scamt-itmo.ru (M.S.D.)

<sup>2</sup> Department of Chemistry, Moscow State University, 119991 Moscow, Russia; moiseeva@org.chem.msu.ru (A.A.M.); dmh200949@gmail.com (D.A.G.); krasnovskaya@gmail.com (O.O.K.); beloglazki@mail.ru (E.K.B.); shtilaa@yahoo.com (A.A.S.)

<sup>3</sup> Institute of Cytology, Russian Academy of Sciences, 194064 Saint-Petersburg, Russia; efimova@incras.ru (S.S.E.); osostroumova@mail.ru (O.S.O.)

<sup>4</sup> Emanuel Institute of Biochemical Physics, Russian Academy of Sciences, 119334 Moscow, Russia; alenmark25@gmail.com (A.A.M.); anna-shiba@mail.ru (A.V.S.)

<sup>5</sup> A.N.Nesmeyanov Institute of Organoelement Compounds, Russian Academy of Sciences, 119334 Moscow, Russia; vika.alpatova@gmail.com (V.M.A.); porphyrin@yandex.ru (A.V.Z.); olshevsk@ineos.ac.ru (V.A.O.)

<sup>6</sup> Institute of Gene Biology, Russian Academy of Sciences, 119334 Moscow, Russia; tatarskii@gmail.com

<sup>7</sup> Blokhin National Medical Research Center of Oncology, 115478 Moscow, Russia; shtilaa@yahoo.com (A.A.S.)

\* Correspondence: Correspondence: zimbals@scamt-itmo.ru

† These authors share senior authorship.

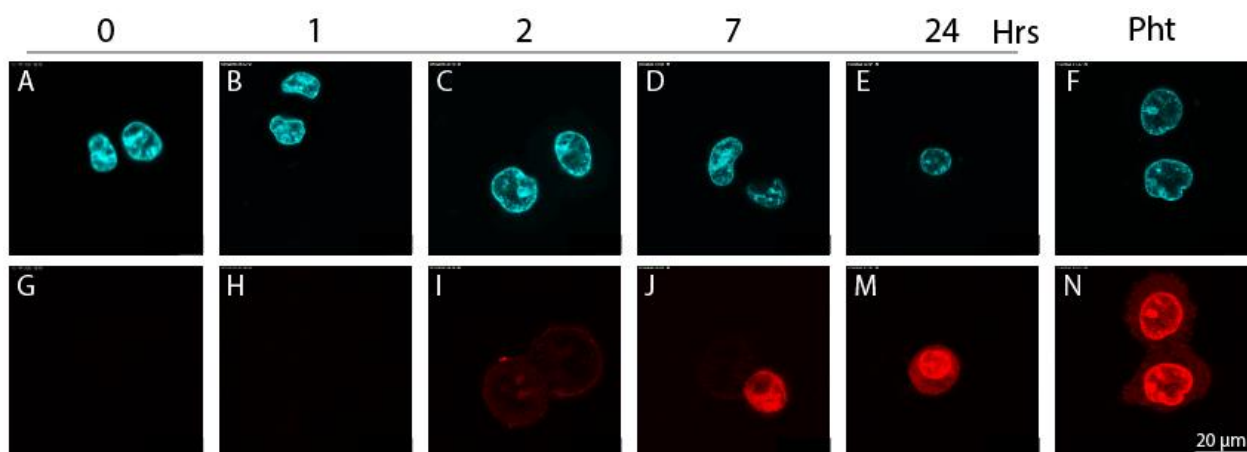

**Figure S1. Time course of the plasma membrane damage by CuO+NAC.** The HCT116 cells were treated with 1  $\mu\text{g/ml}$  CuO+1 mM NAC for indicated time intervals or with photolon (Pht; 10  $\mu\text{M}$ , 3 h) and stained with Hoechst 33342 (*top panel*) or PI (*bottom panel*). Images were taken on a Leica TCS SPE laser confocal microscope. Shown is one representative experiment out of 3 with similar results.

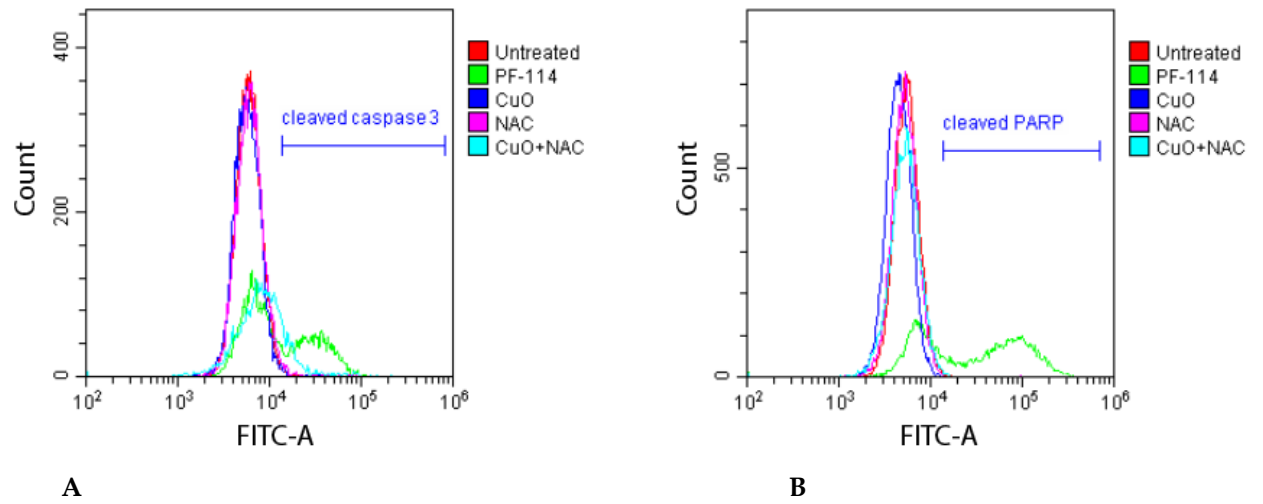

**Figure S2.** Lack of caspase 3 activation and PARP cleavage in K562 cells treated with CuO+NAC. . Immunostaining of K562 cells for cleaved caspase 3 (A) and PARP (B). PF-114, a Bcr-Abl inhibitor, is used as a reference inducer of apoptosis in Bcr-Abl positive K562 cells (see main text for details).

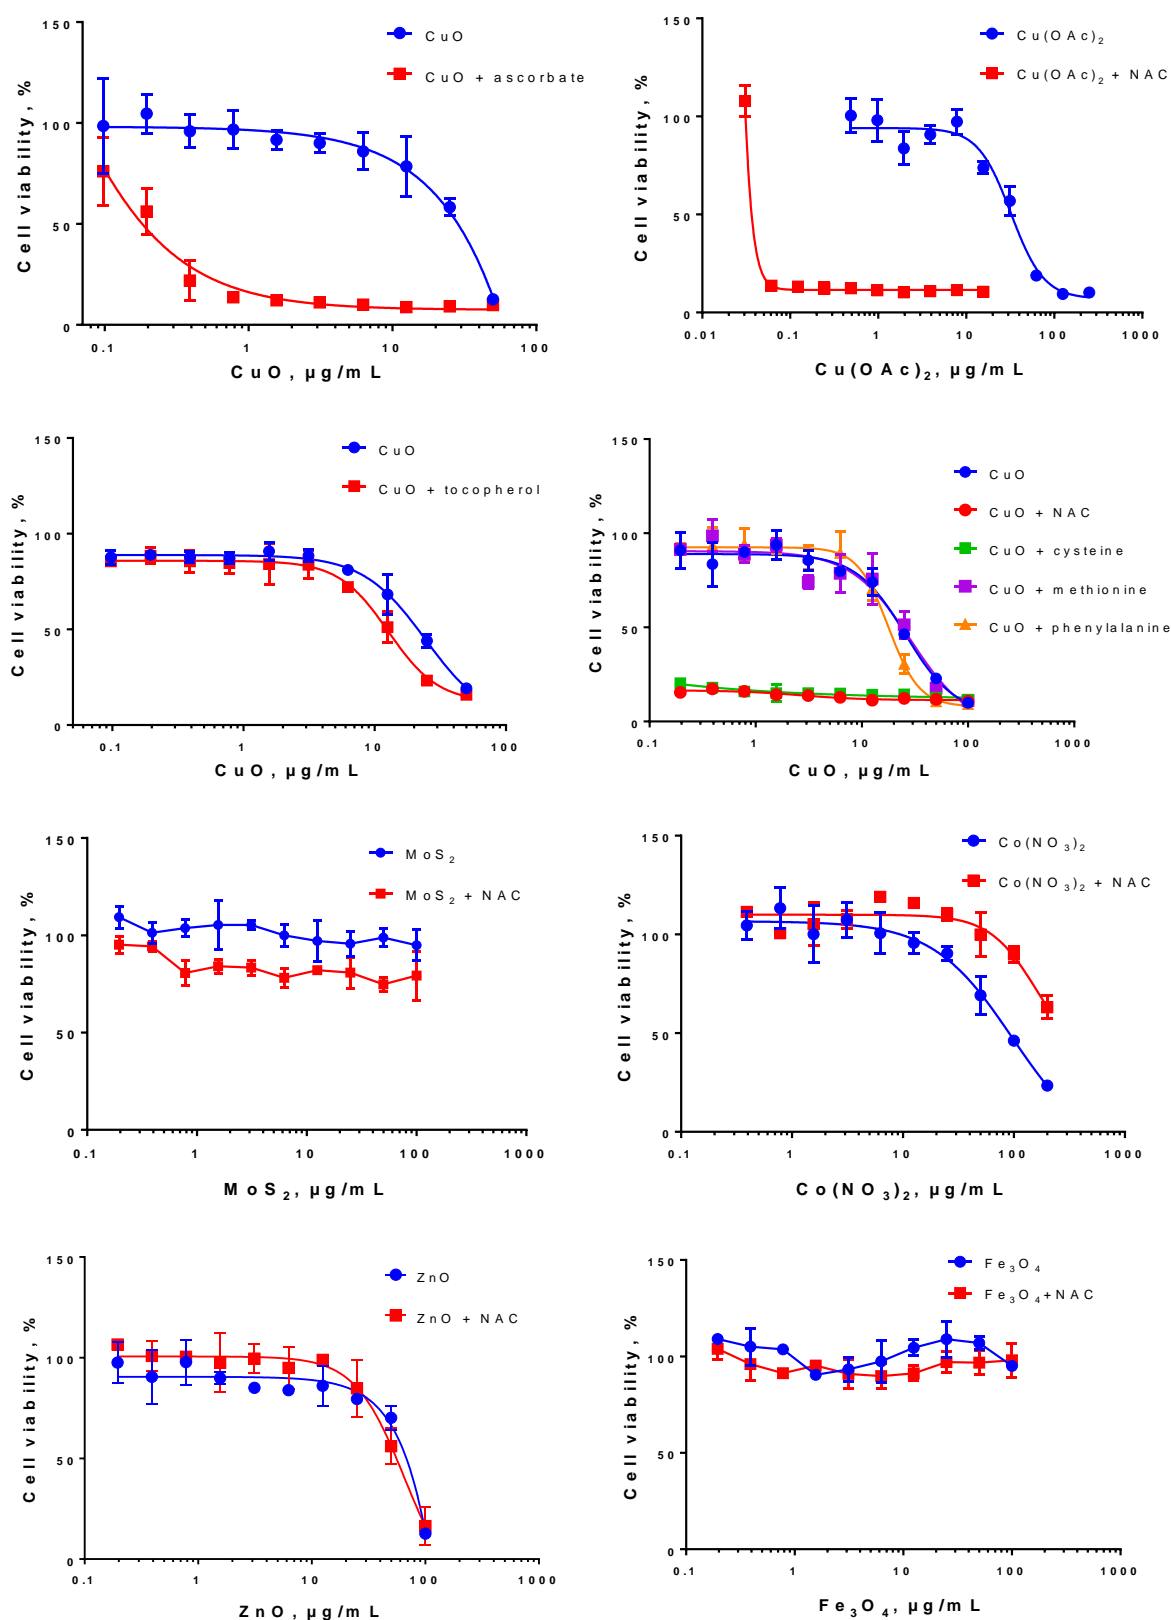

**Figure S3.** Differential efficacy of combinations of metal containing compounds with ascorbate,  $\alpha$ -tocopherol and amino acids. Shown are the results of MTT tests, each value is mean  $\pm$  S.D. of 3-4 independent measurements. NAC, 1 mM.

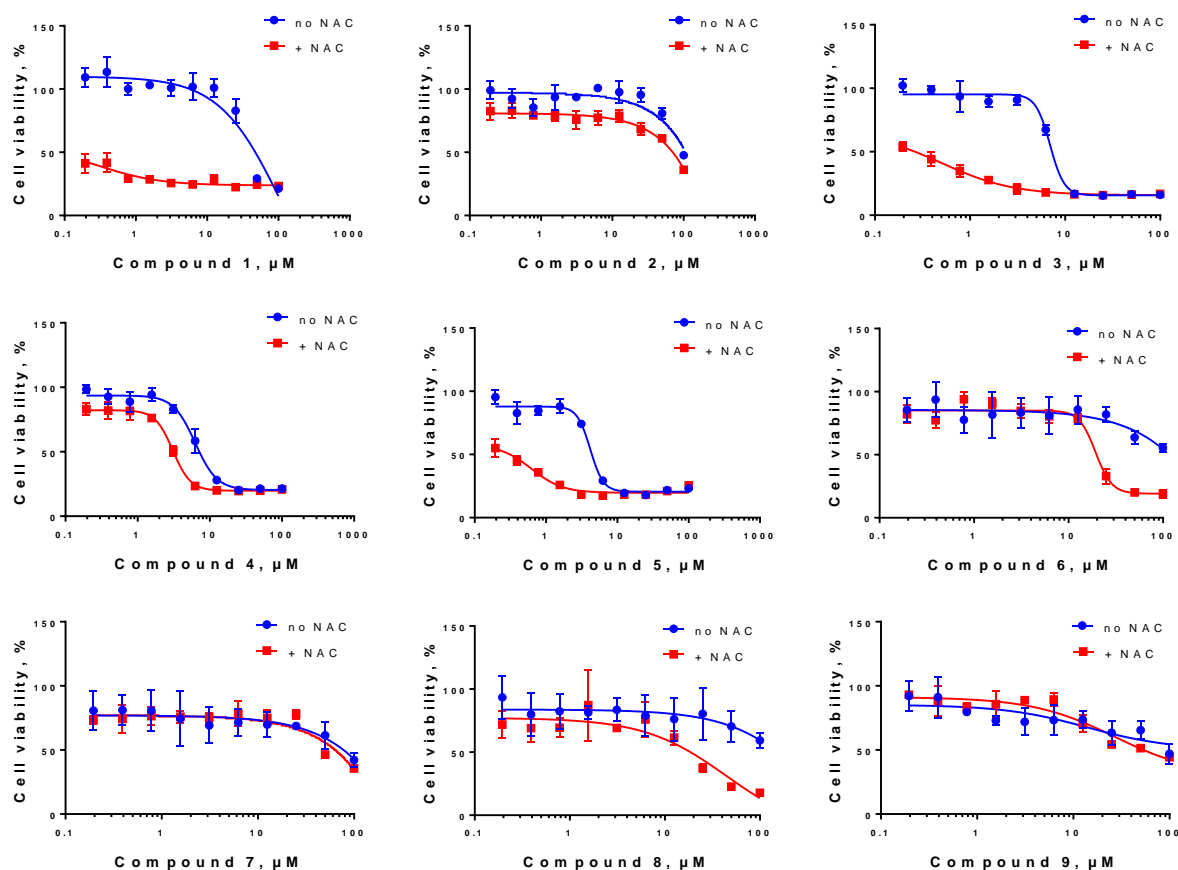

**Figure S4.** Cytotoxicity of Cu-organic compounds and metal free carcasses for HCT116 cells. NAC, 1 mM. Shown are the results of MTT tests, each value is mean  $\pm$  S.D. of 3-4 independent measurements.

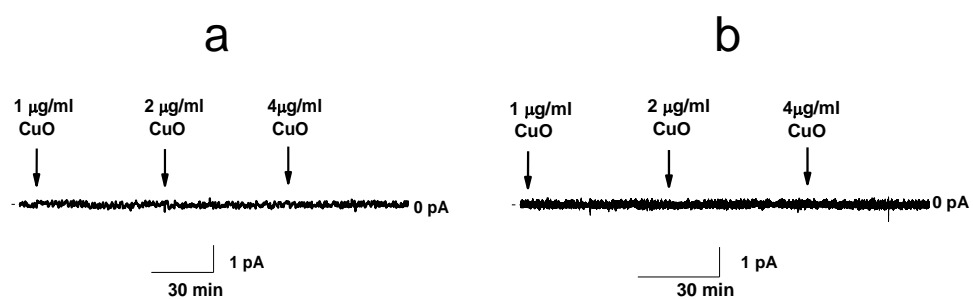

**Figure S5.** Current fluctuations induced by CuO NPs (1-4 μg/ml) in lipid bilayers composed of POPC (a) and POPG (b) and bathed in 0.1 M KCl pH 7.4. The transmembrane voltage was 50 mV. Arrows indicate the addition of CuO NPs to the membrane bathing solution.

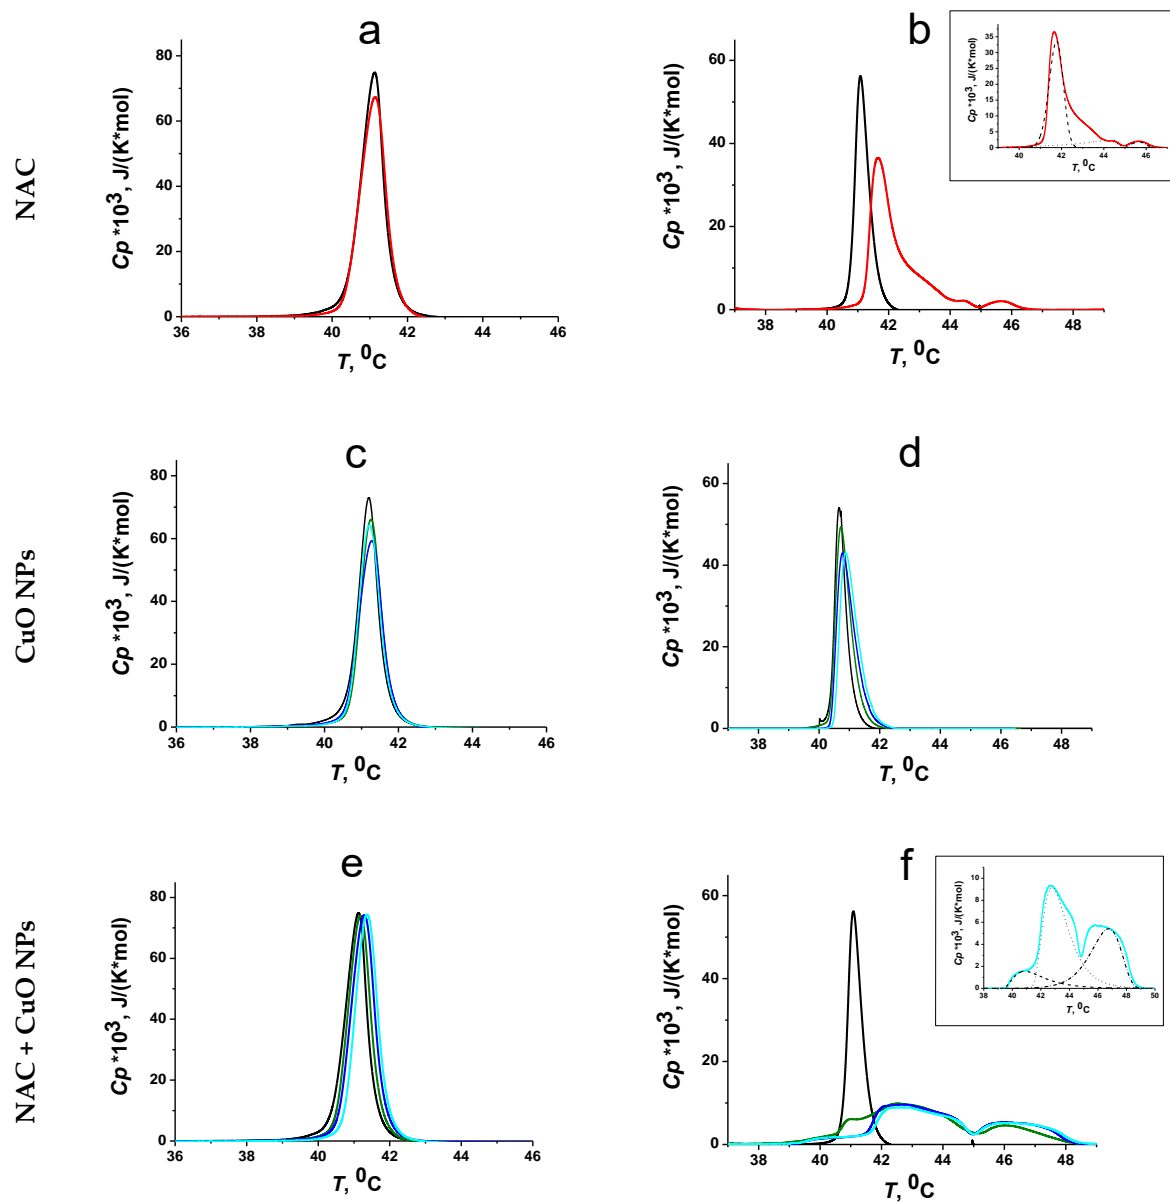

**Figure S6.** Heating DSC thermograms of DPPC (a,c,e) and DPPG (b,d,f) liposomes in the absence (*black lines*) and presence of NAC (1 mM) (a,b, *red lines*), CuO NPs (c,d) (1  $\mu$ g/ml, *green lines*; 2  $\mu$ g/ml, *blue lines*; 4  $\mu$ g/ml, *cyan lines*) or in combination (e,f). Shown are the results of one representative scan out of two independent measurements and two cool-heat scan steps for each system.

# LC-MS data

## Chromatogram

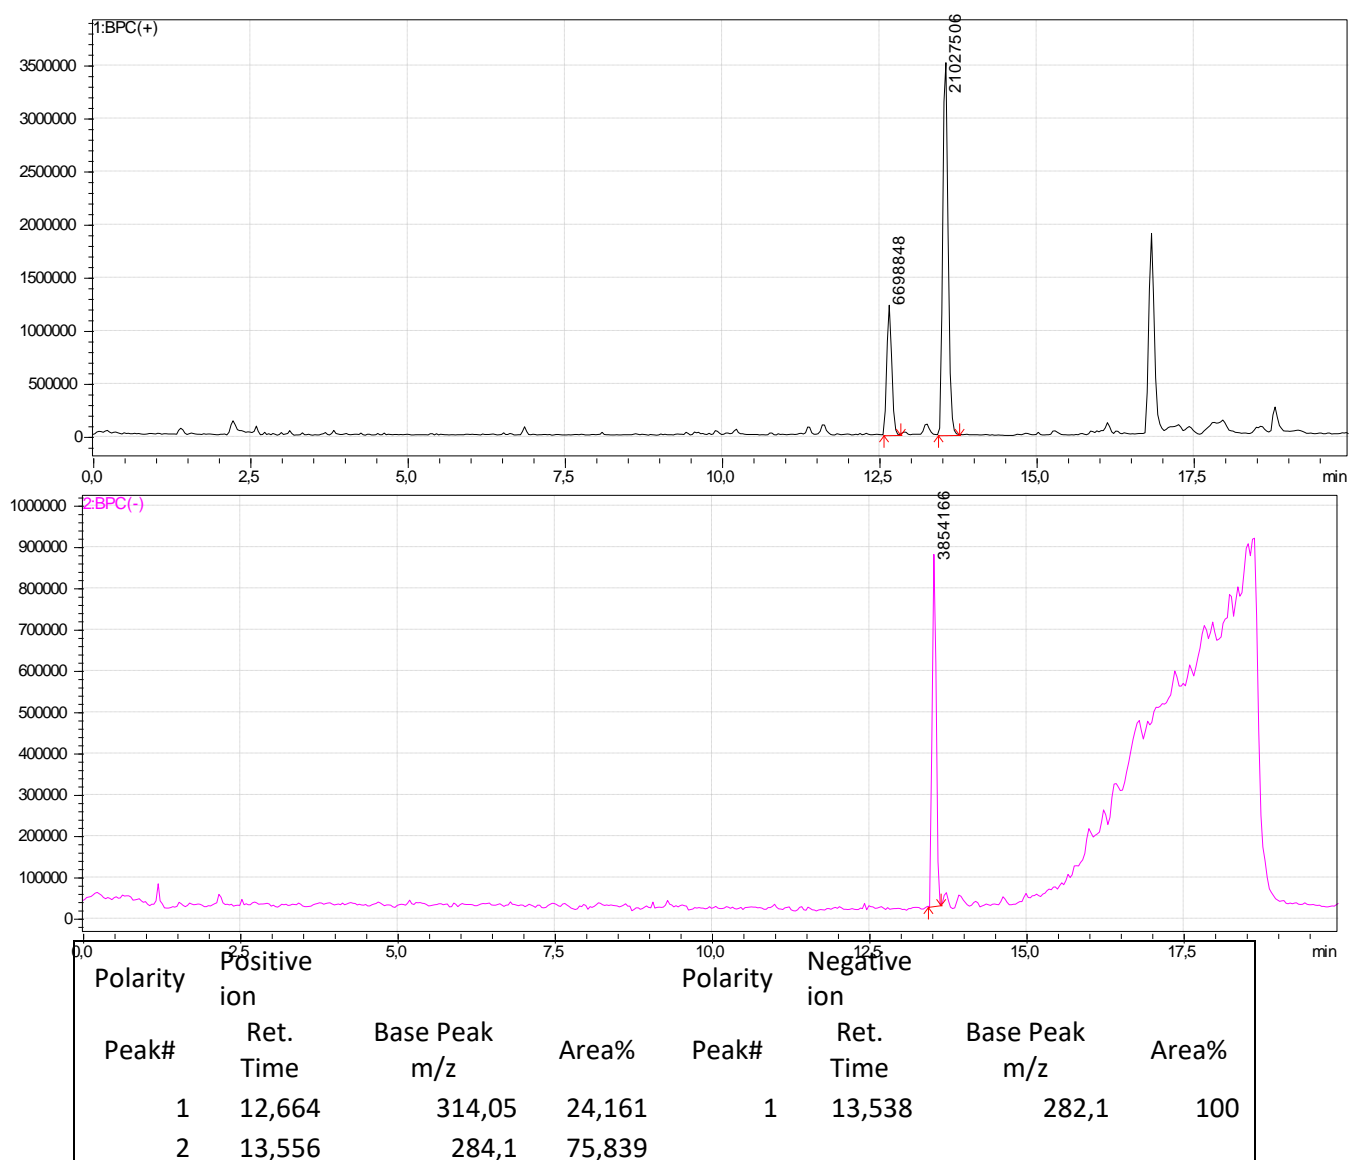

## Spectra

Polarity Positive ion

Peak# 1

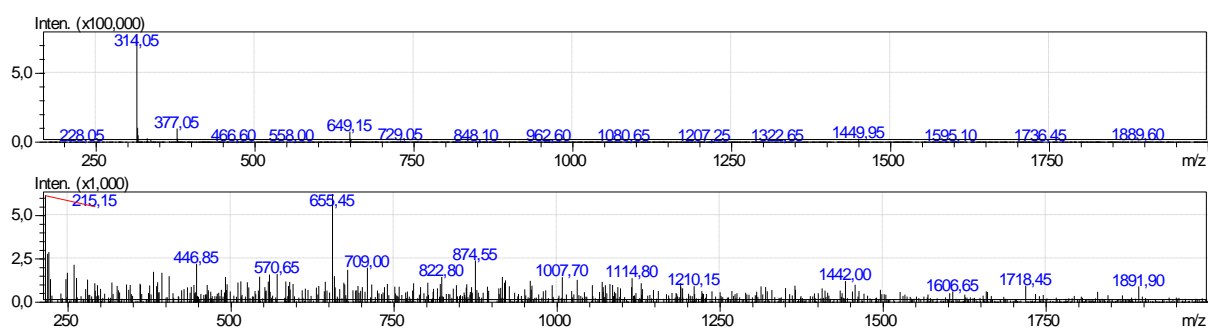

Peak# 2

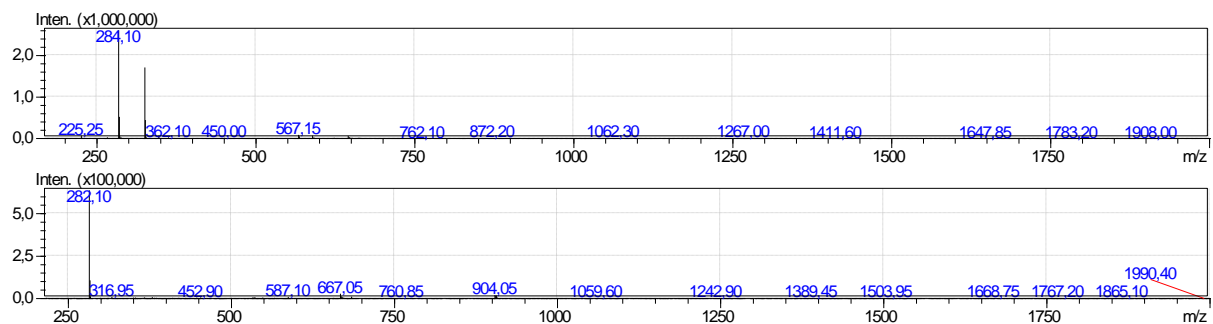

Polarity Negative  
ion

Peak# 1

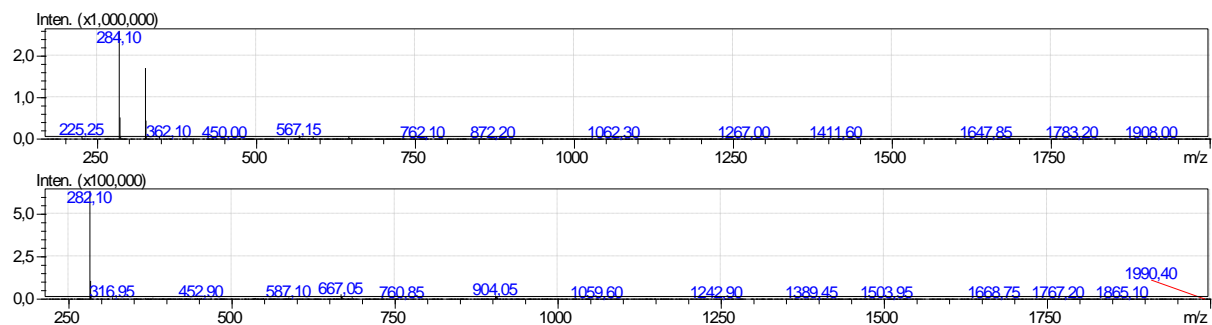

Figure S7. LC-MS mass spectra of the supernatant obtained by the reaction of **1** with NAC.

Chromatogram

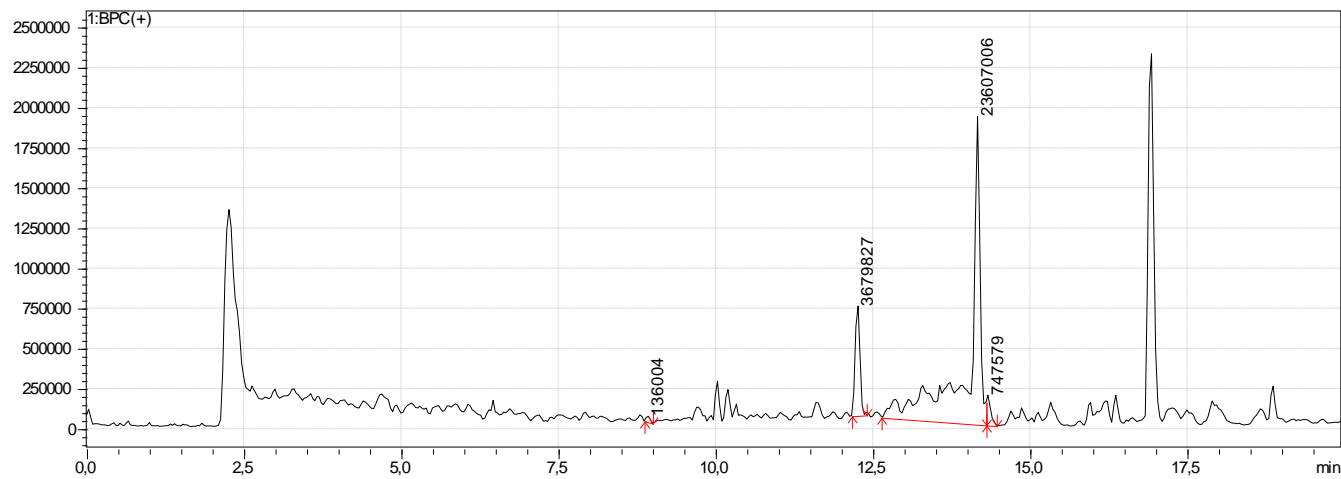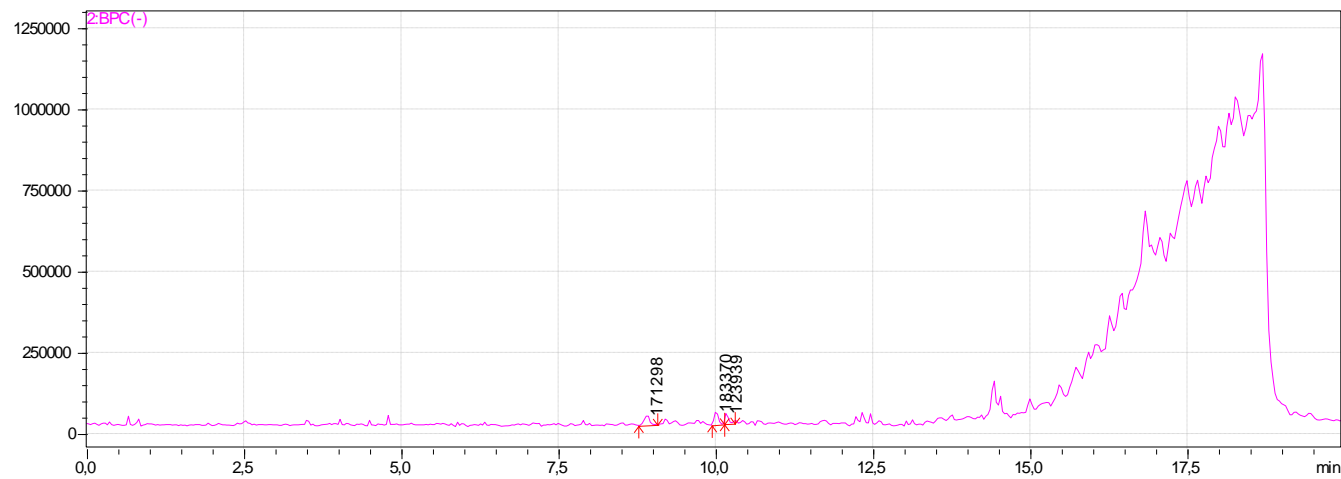

| Polarity | Positive ion |               |        |  | Polarity | Negative ion |               |        |  |
|----------|--------------|---------------|--------|--|----------|--------------|---------------|--------|--|
| Peak#    | Ret. Time    | Base Peak m/z | Area%  |  | Peak#    | Ret. Time    | Base Peak m/z | Area%  |  |
| 1        | 8,926        | 325,05        | 0,483  |  | 1        | 8,917        | 322,95        | 35,791 |  |
| 2        | 12,26        | 286           | 13,063 |  | 2        | 10,011       | 514,3         | 38,313 |  |
| 3        | 14,166       | 272,1         | 83,801 |  | 3        | 10,174       | 627,4         | 25,896 |  |
| 4        | 14,33        | 437,2         | 2,654  |  |          |              |               |        |  |

Polarity Positive ion

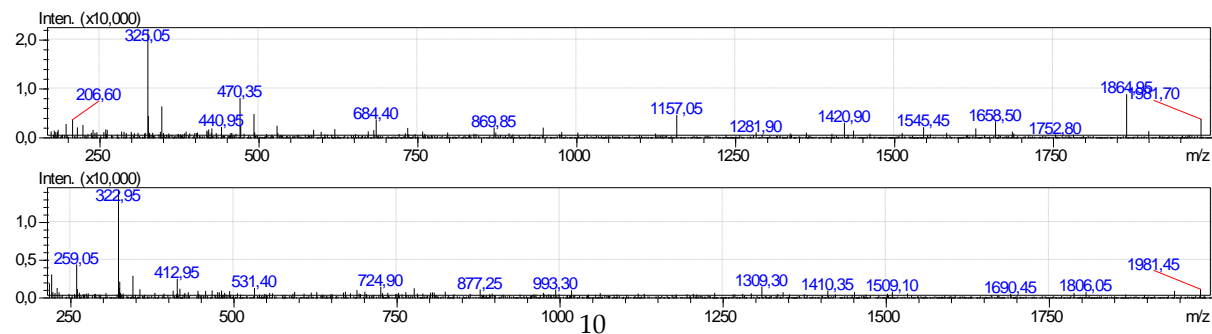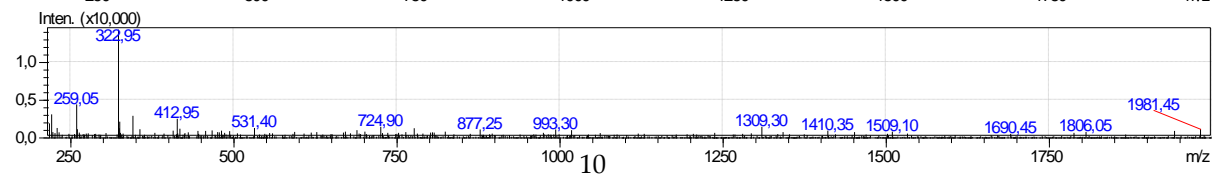

Peak# 2

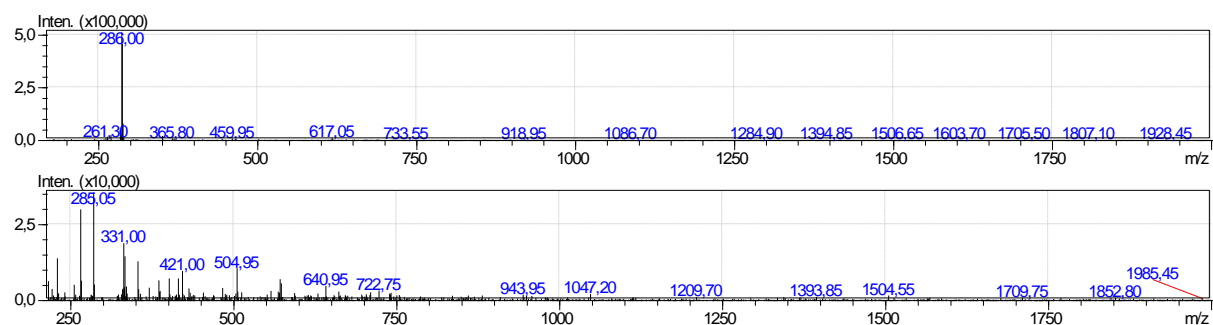

Peak# 3

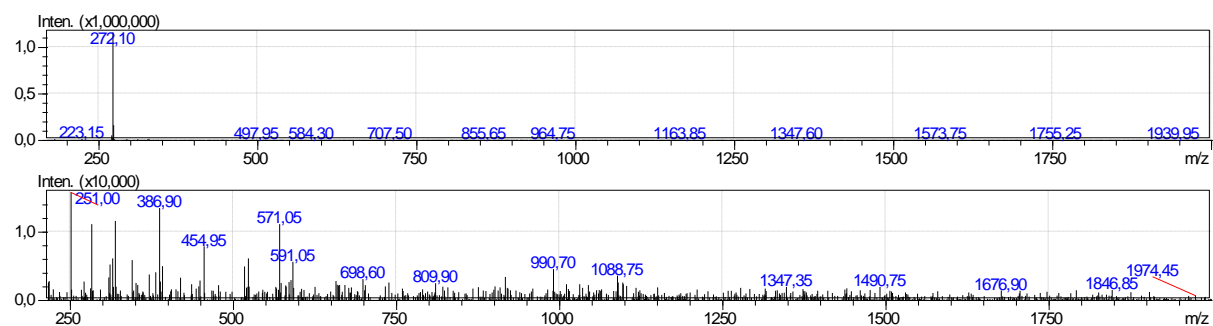

Peak# 4

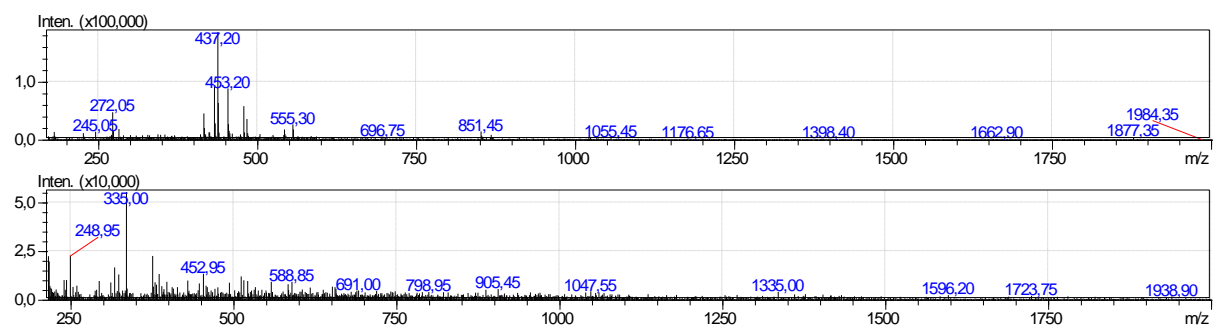

Negative  
Polarity ion

Peak# 1

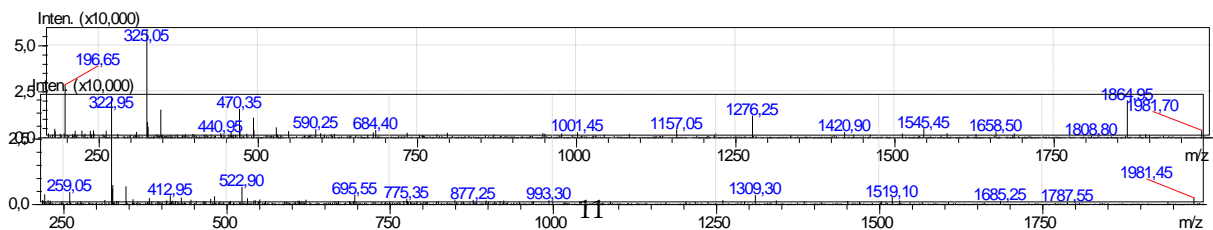

Peak# 2

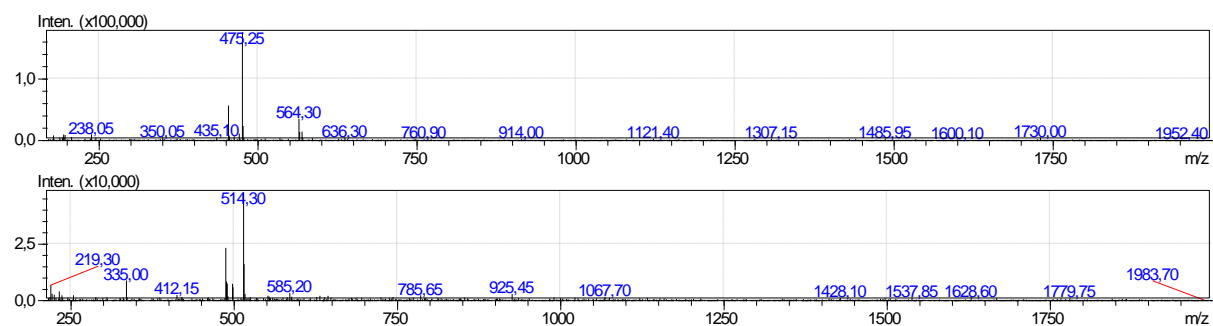

Peak# 3

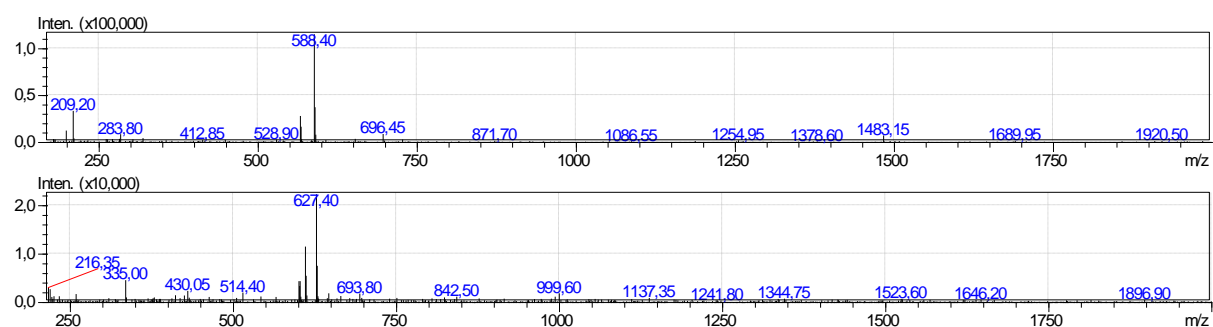

**Figure S8.** LC-MS mass spectra of the supernatant obtained in the reaction of Cu-NP with NAC (1:1 molar ratio).

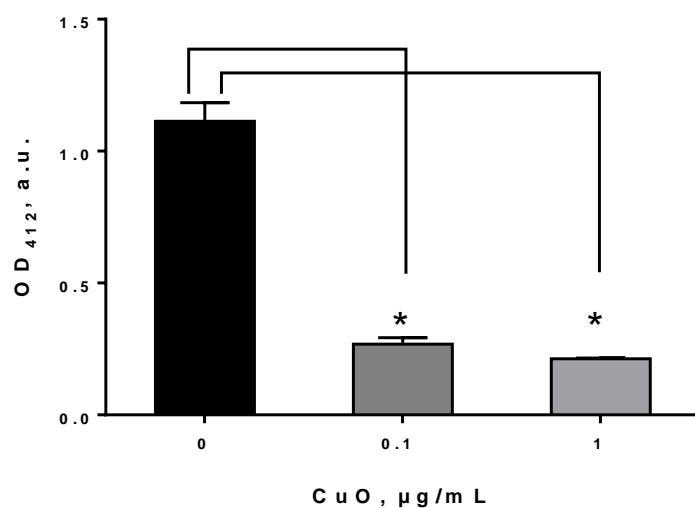

**Figure S9.** CuO abrogates the detection of SH groups with DNTB. Each sample contained 1 mM NAC. SH groups were detected in a colorimetric reaction (see *Experimental* for details). Note that the addition of CuO NPs immediately dropped OD values indicating a dramatic decrease of SH content. Shown are mean + SD of three independent measurements. \* $p < 0.01$ .

Chromatogram

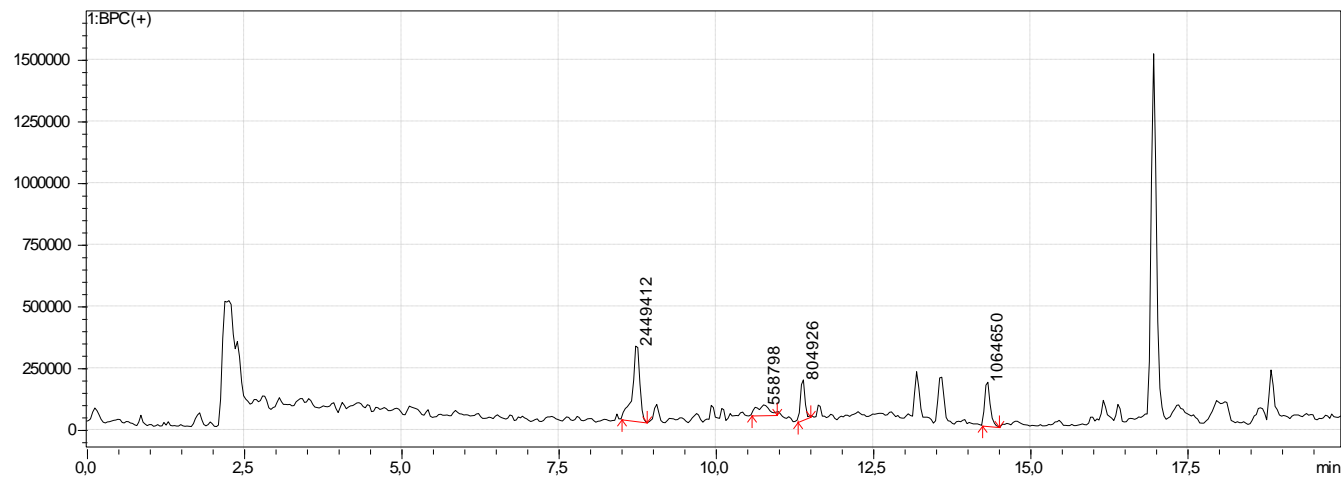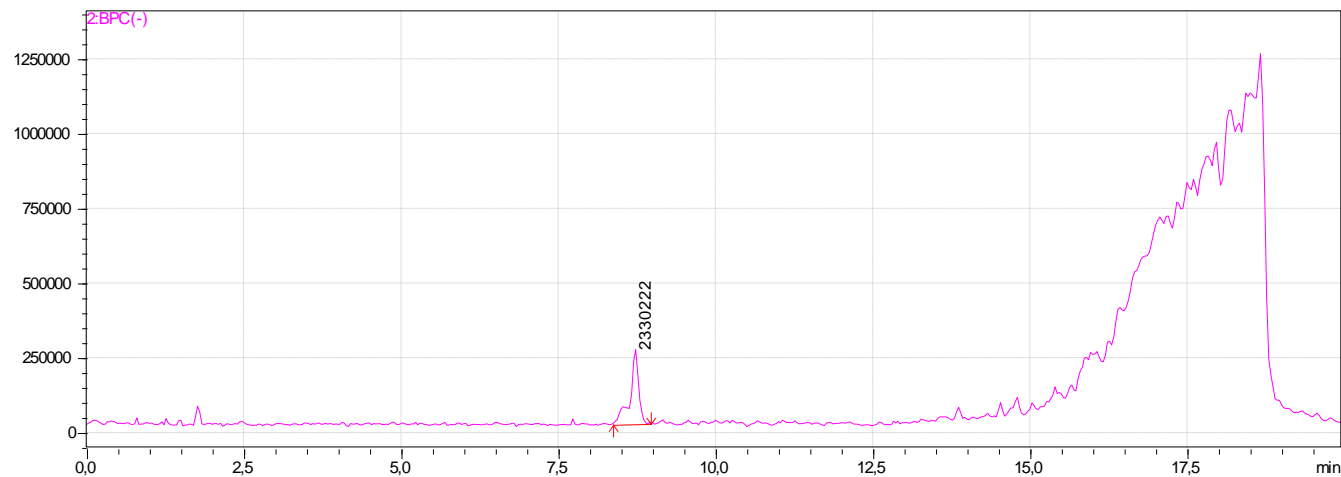

| Polarity Positive ion |           |               |        | Polarity Negative ion |           |               |       |
|-----------------------|-----------|---------------|--------|-----------------------|-----------|---------------|-------|
| Peak#                 | Ret. Time | Base Peak m/z | Area%  | Peak#                 | Ret. Time | Base Peak m/z | Area% |
| 1                     | 8,749     | 325,05        | 50,216 | 1                     | 8,727     | 323           | 100   |
| 2                     | 10,775    | 178,1         | 11,456 |                       |           |               |       |
| 3                     | 11,389    | 274,3         | 16,502 |                       |           |               |       |
| 4                     | 14,32     | 437,15        | 21,826 |                       |           |               |       |

Spectra

Polarity Positive ion

Peak# 1

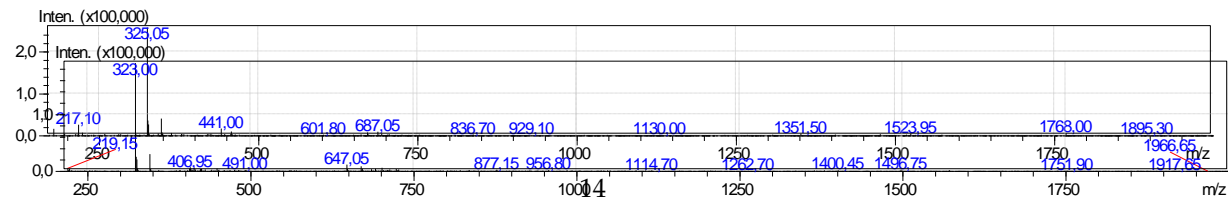

Peak# 2

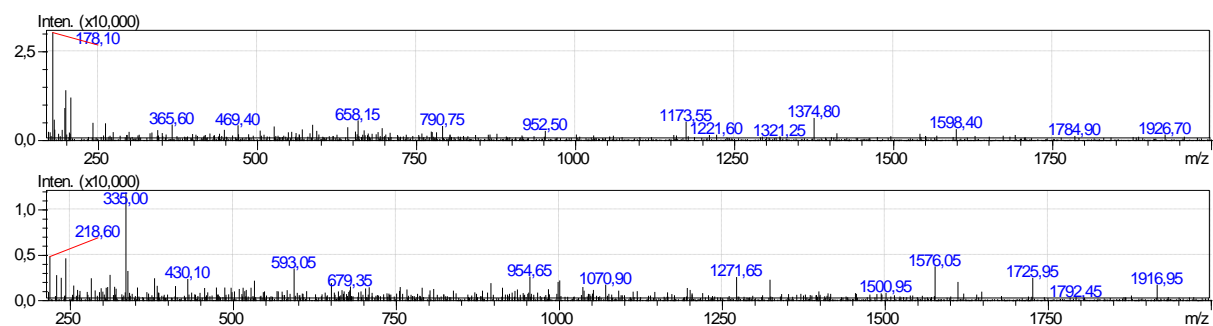

Peak# 3

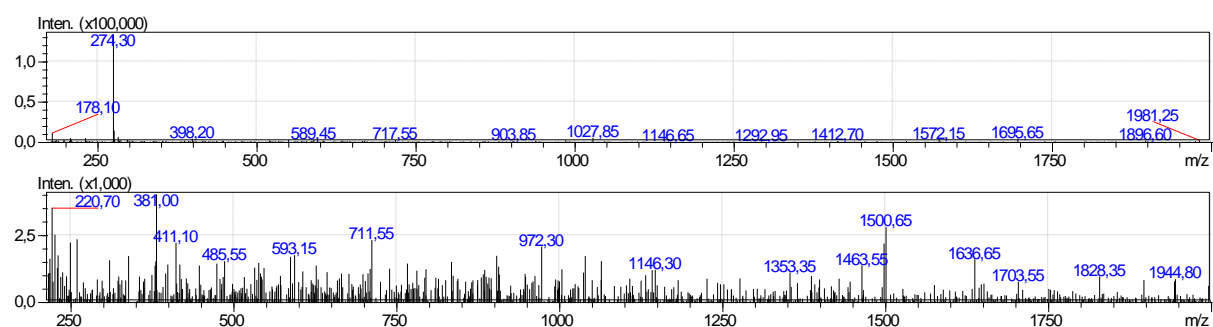

Peak# 4

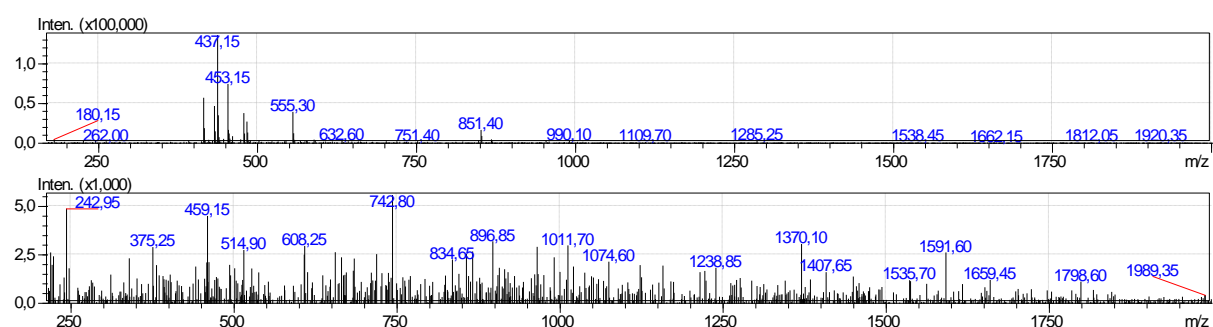

Polarity Negative ion

Peak# 1

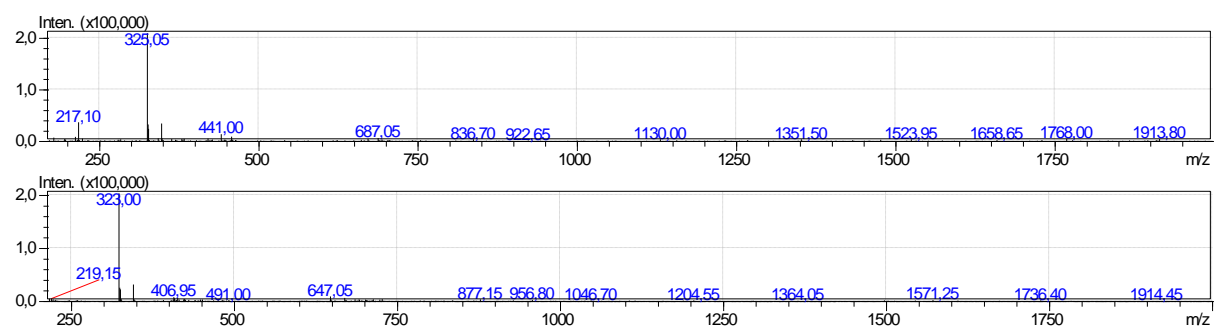

**Figure S10.** LC-MS mass spectra of the supernatant obtained in the reaction of Cu-NP with NAC (1:3 molar ratio).

Chromatogram

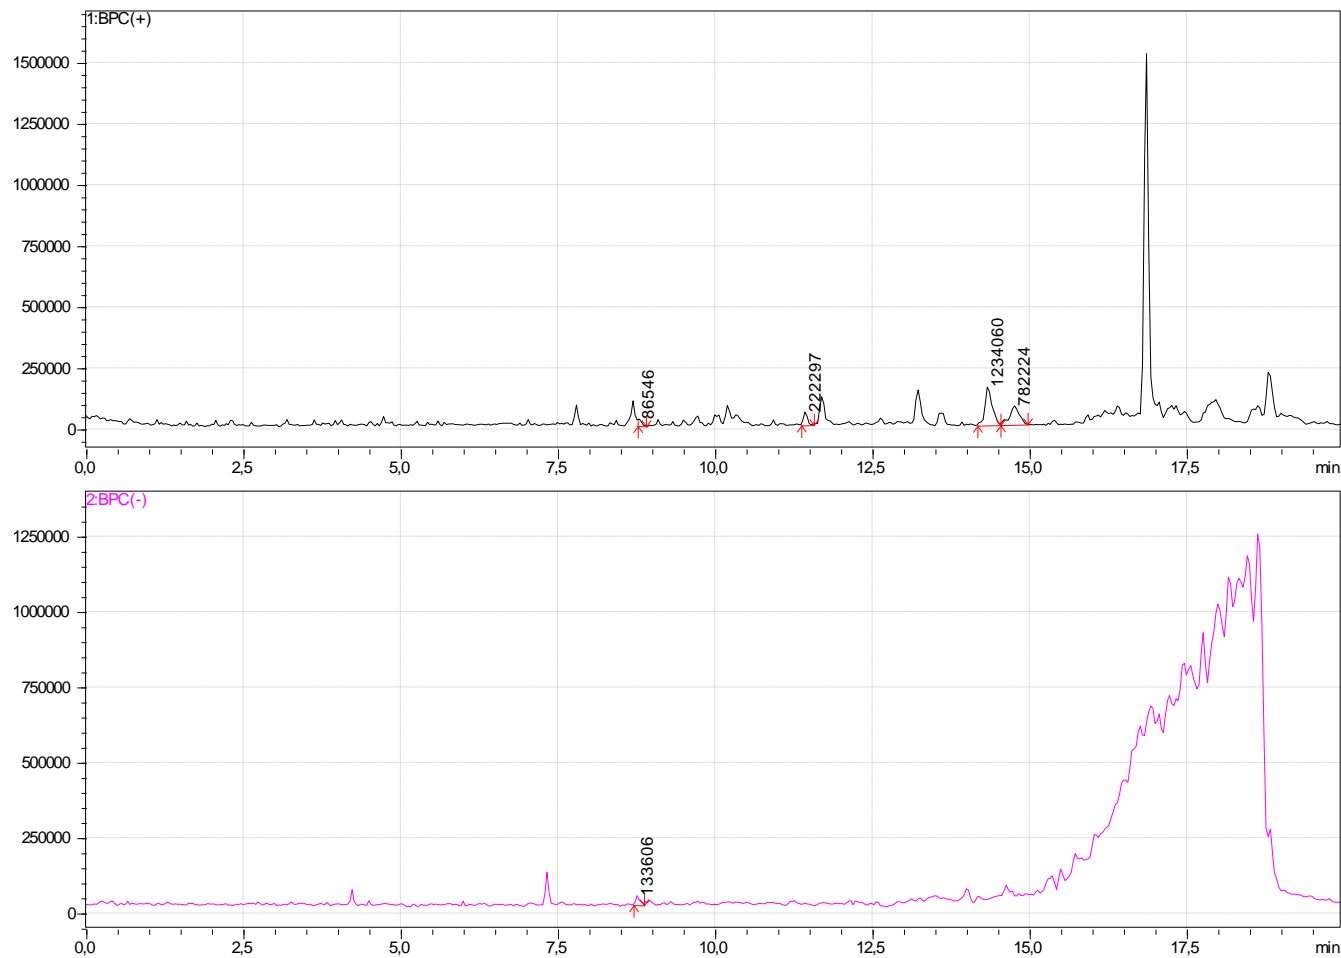

| Polarity Positive ion |           |               |        | Polarity Negative ion |           |               |       |
|-----------------------|-----------|---------------|--------|-----------------------|-----------|---------------|-------|
| Peak#                 | Ret. Time | Base Peak m/z | Area%  | Peak#                 | Ret. Time | Base Peak m/z | Area% |
| 1                     | 8,79      | 325,05        | 3,722  | 1                     | 8,77      | 323,05        | 100   |
| 2                     | 11,439    | 274,25        | 9,561  |                       |           |               |       |
| 3                     | 14,343    | 437,2         | 53,075 |                       |           |               |       |
| 4                     | 14,766    | 437,2         | 33,642 |                       |           |               |       |

Spectra

Polarity Positive ion

Peak# 1

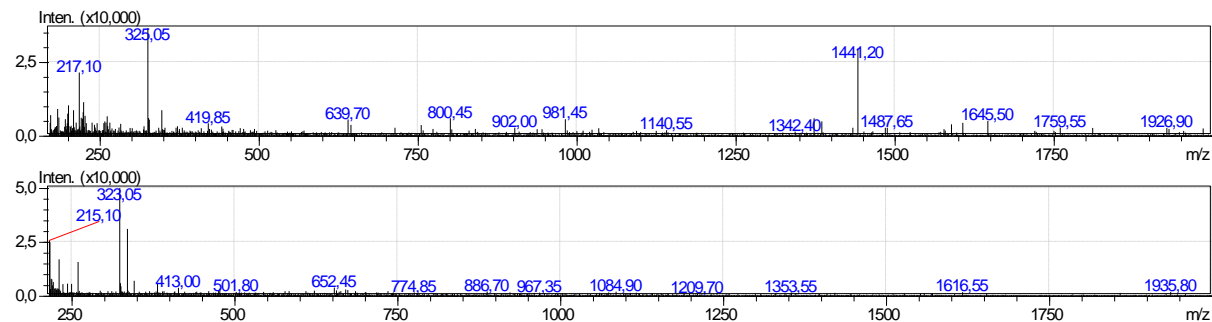

Peak# 2

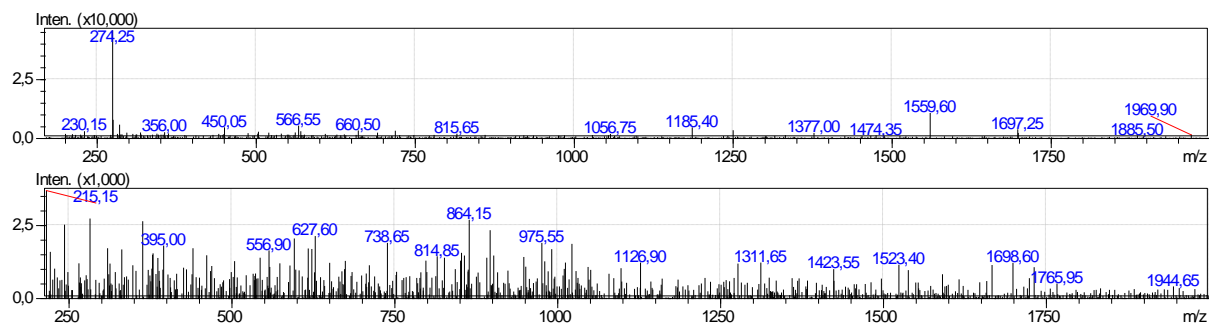

Peak# 3

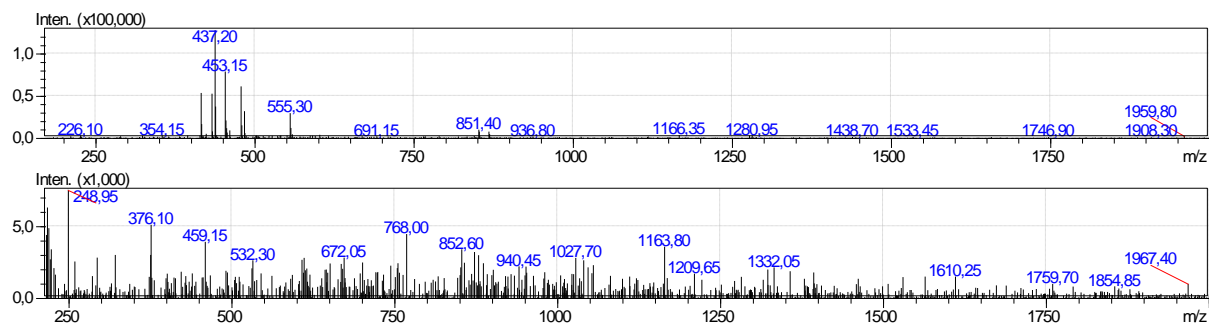

Peak# 4

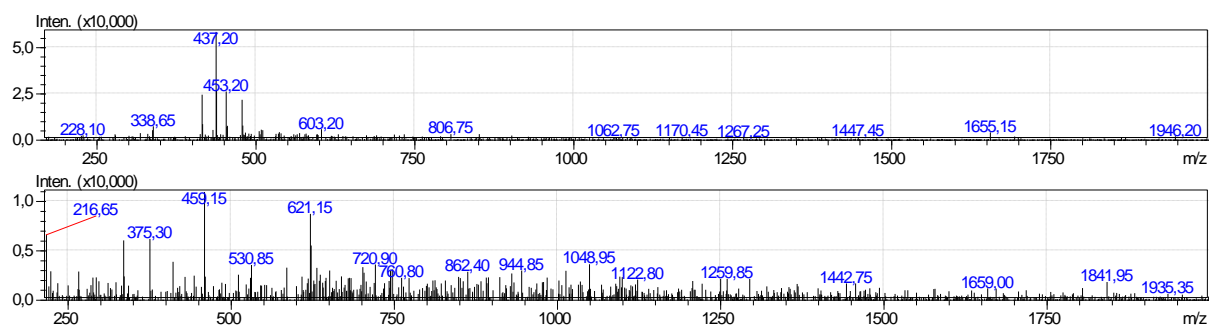

Polarity Negative ion

Peak# 1

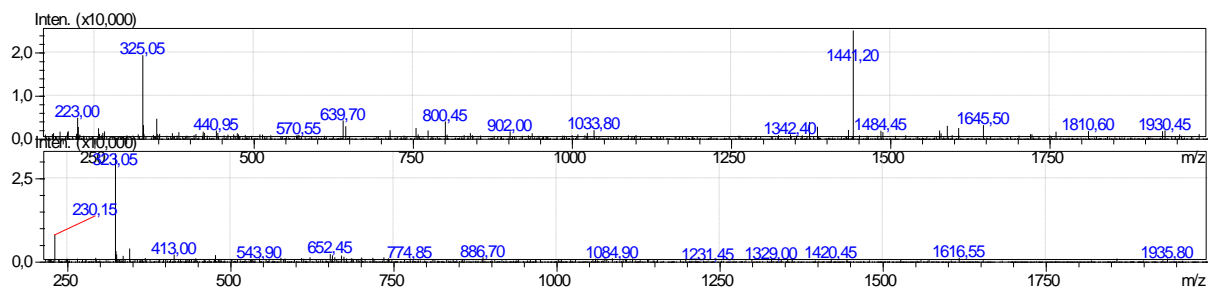

**Figure S11.** LC-MS mass spectra of the supernatant mixture obtained by the reaction of Cu-NP with NAC (1:10 molar ratio).

**Table S1.** Thermodynamic characteristics of DPPC and DPPG melting in the presence of NAC, CuO NPs and their combinations.

| Treatment | Concentration  | DPPC       |                | DPPG       |                |
|-----------|----------------|------------|----------------|------------|----------------|
|           |                | $T_m$ , °C | $T_{1/2}$ , °C | $T_m$ , °C | $T_{1/2}$ , °C |
| No        | –              | 41.2       | 0.6            | 41.1       | 0.7            |
| NAC       | 1 mM           | 41.2       | 0.6            | 41.7*      | 0.9*           |
| CuO       | 1 µg/ml        | 41.2       | 0.6            | 41.1       | 0.7            |
|           | 2 µg/ml        | 41.2       | 0.6            | 41.1       | 0.7            |
|           | 4 µg/ml        | 41.2       | 0.6            | 41.1       | 0.7            |
| NAC + CuO | 1 mM + 1 µg/ml | 41.2       | 0.6            | 42.5*      | 3.6*           |
|           | 1 mM + 2 µg/ml | 41.3       | 0.6            | 42.6*      | 3.0*           |
|           | 1 mM + 4 µg/ml | 41.3       | 0.6            | 42.6*      | 2.8*           |

$T_m$  is maximum temperature of main lipid phase transition;  $T_{1/2}$  is the half-width of the main peak. \*deconvolution of the main peak is observed.
